# Supplementary material for: Strategies for aggregating gene expression data: The collapseRows R function
Source: Springer Nature journal article supplement (doi:10.1186/1471-2105-12-322), 2011-08-04

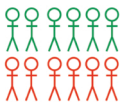

Data from two (or more) labs

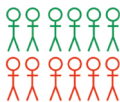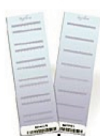

Arrays run on different platforms

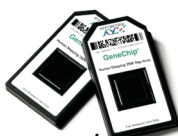

|         | S1 | S2 |
|---------|----|----|
| Probe 1 | 81 | 59 |
| Probe 2 | 91 | 52 |
| Probe 3 | 87 | 75 |

Probe-level data

|         | S1 | S2 |
|---------|----|----|
| Probe 1 | 81 | 59 |
| Probe 2 | 91 | 52 |
| Probe 3 | 87 | 75 |

*collapseRows* - 1.max strategy

|        | S1 | S2 |
|--------|----|----|
| Gene 1 | 81 | 59 |
| Gene 2 | 87 | 75 |
| Gene 3 | 41 | 43 |

Gene-level data

|        | S1 | S2 |
|--------|----|----|
| Gene 1 | 81 | 59 |
| Gene 2 | 87 | 75 |
| Gene 3 | 41 | 43 |

Consensus Network

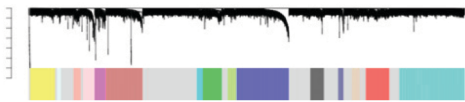

*collapseRows* - 3.kMax strategy

Module-level data

|                          | S1 | S2 |
|--------------------------|----|----|
| Collapsed module value 1 | 78 | 61 |
| Collapsed module value 2 | 89 | 55 |
| Collapsed module value 3 | 94 | 73 |

Relationship between module and clinical outcome

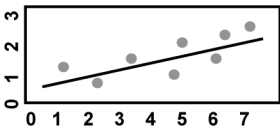

Supplement: 12859_2011_4746_MOESM4_ESM.pdf [file 12859_2011_4746_MOESM4_ESM.pdf]
