# Supplementary material for: Strategies for aggregating gene expression data: The collapseRows R function
Source: Springer Nature journal article supplement (doi:10.1186/1471-2105-12-322), 2011-08-04

**A) Human Brain:  $p < 10^{-225}$** 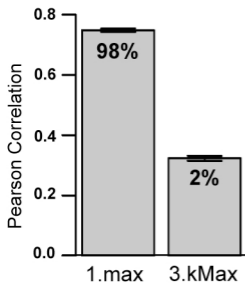**Human Brain:  $p < 10^{-90}$** 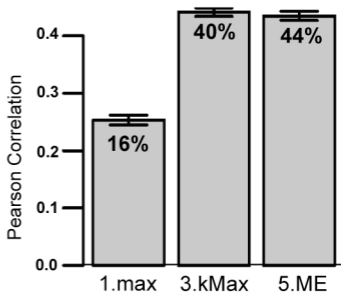**B) Mouse Brain:  $p = 0$** 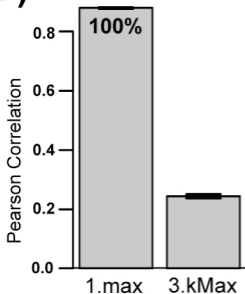**Mouse Brain:  $p < 10^{-97}$** 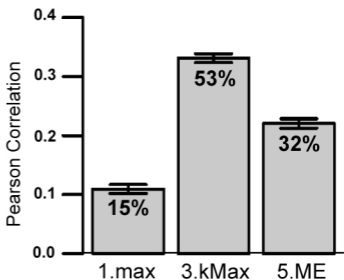**C) Human Blood:  $p < 10^{-95}$** 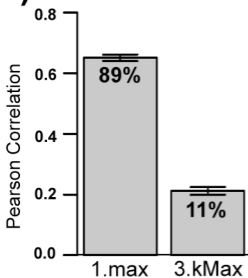**Human Blood:  $p < 10^{-59}$** 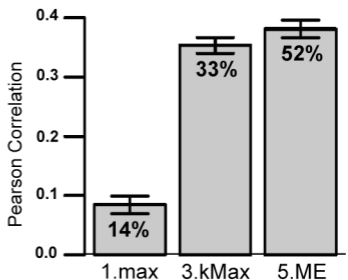

Supplement: 12859_2011_4746_MOESM6_ESM.pdf [file 12859_2011_4746_MOESM6_ESM.pdf]
