# Supplementary material for: Strategies for aggregating gene expression data: The collapseRows R function
Source: Springer Nature journal article supplement (doi:10.1186/1471-2105-12-322), 2011-08-04

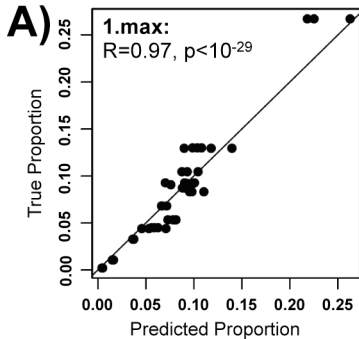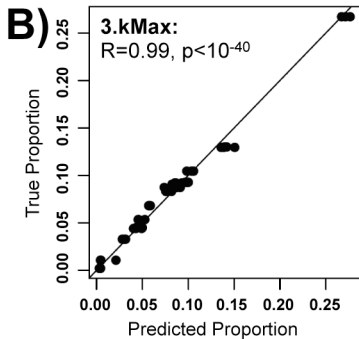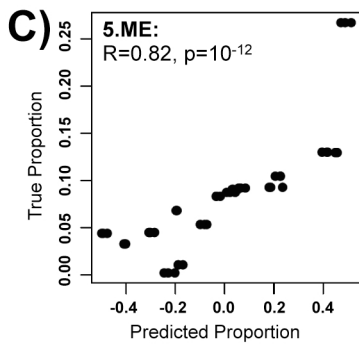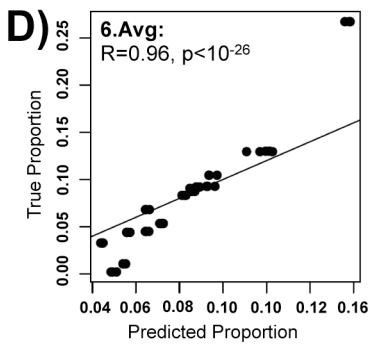

Supplement: 12859_2011_4746_MOESM7_ESM.pdf [file 12859_2011_4746_MOESM7_ESM.pdf]
